# Supplementary material
Source: PubMed Central journal article supplement (PMC153026)

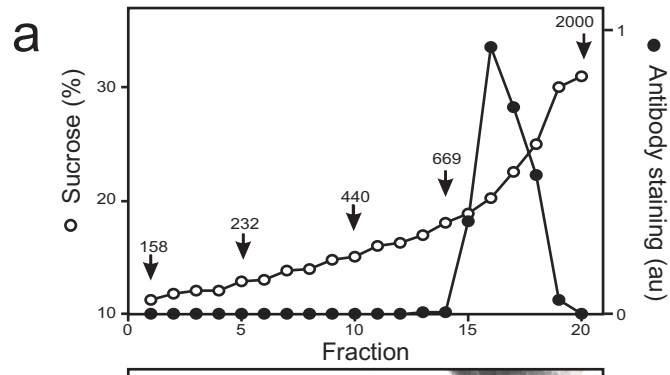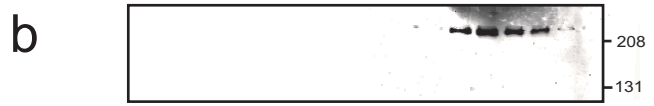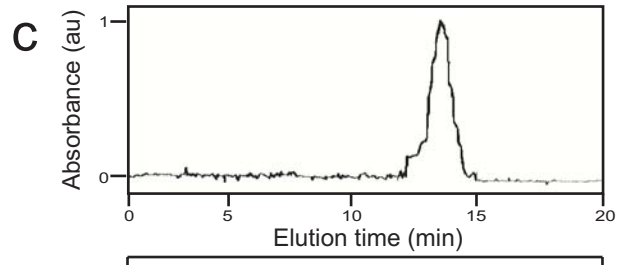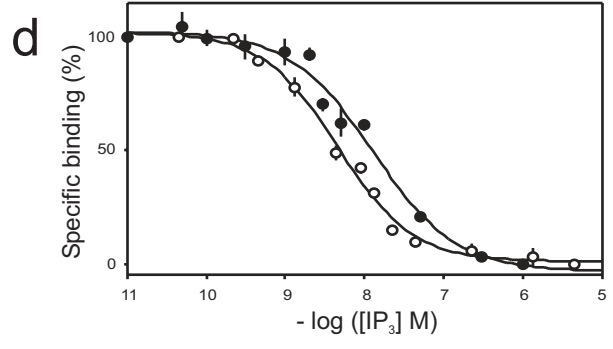

Supplement: pnas_0536251100_2.pdf [file pnas_0536251100_2.pdf]

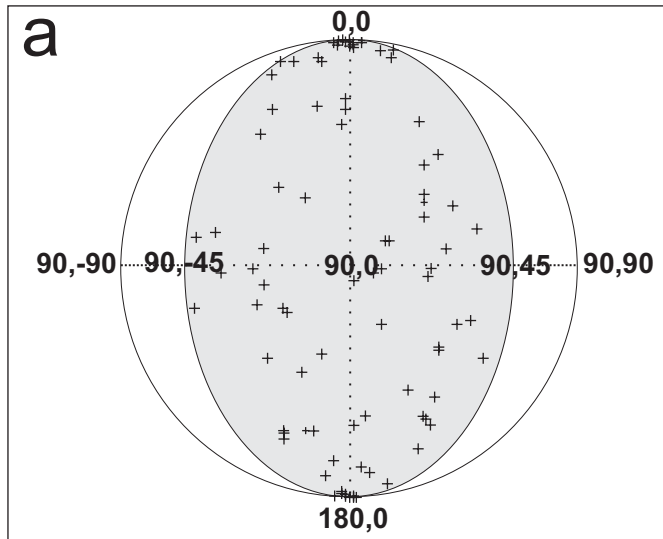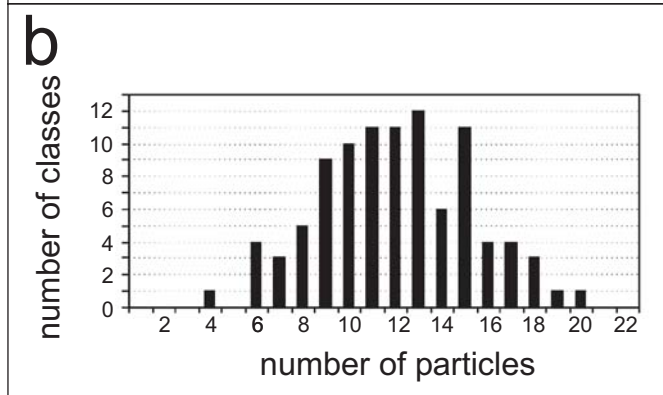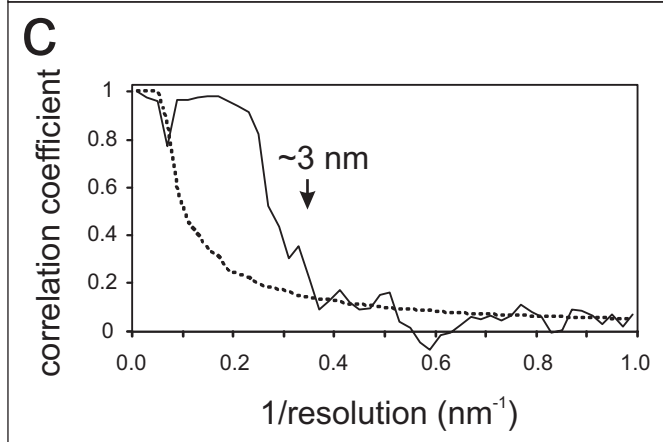

Supplement: pnas_0536251100_4.pdf [file pnas_0536251100_4.pdf]
